# Supplementary material
Source: publisher figshare collection journal article supplement (https://asha.figshare.com/articles/dataset/_/13382831)
Supplement: Supplementary file 1 [file 1]

**Supplemental Material S1.** Anticipatory set procedures the parents used during the intervention.

| <b>Anticipatory Set Parent Procedures</b>                                          | <b>Example Parent Actions and Dialogue</b>                                                                         |
|------------------------------------------------------------------------------------|--------------------------------------------------------------------------------------------------------------------|
| Point to title. Say, “Look at the title. This book is called ____.”                | Parent points to title with index finger.<br>“Look at the title. Today we are going to read a book called ____.”   |
| Point to and talk about the pictures on the cover of the book.                     | Parent points to Geraldine on front of book.<br>“Who is that? That’s Geraldine. What kind of animal is Geraldine?” |
| Say, “What do you think this story will be about?”                                 | “What do you think this story will be about?”                                                                      |
| Talk about a personal experience related to the pictures on the front of the book. | “Geraldine is a pig. We saw a pig last weekend. Where did we see the pig?”                                         |
| Respond to any verbal or gestural responses child makes.                           | “That’s right! We saw a pig at the zoo.”                                                                           |
