# Supplementary material
Source: publisher figshare collection journal article supplement (https://asha.figshare.com/articles/dataset/_/13382831)
Supplement: Supplementary file 2 [file 1]

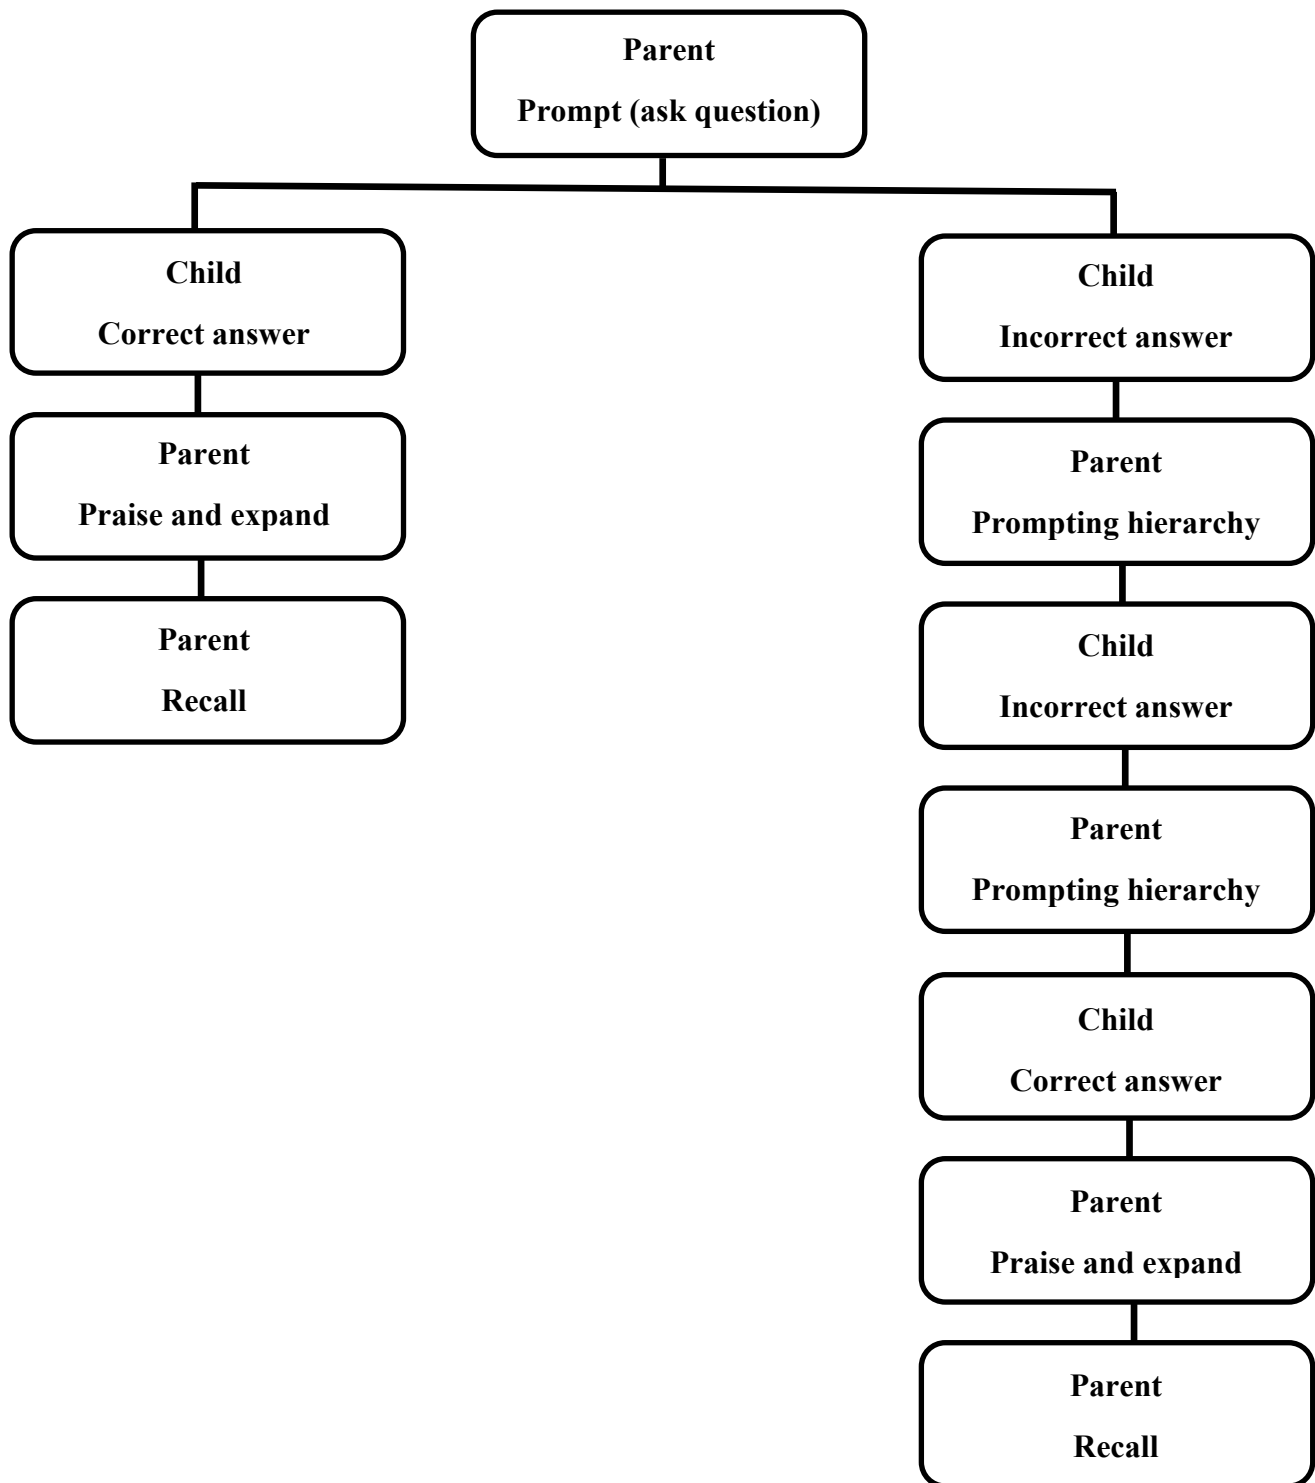

**Supplemental Material S2.** Flow chart depicting child responses and parent implementation of the PEEER strategy.
